# Supplementary material for: Analyzing the Consequences of Sharing Principles on Different Economies: A Case Study of Short Rotation Coppice Poplar Wood Panel Production Value Chain
Source: MDPI journal article supplement (doi:10.3390/f13030461), 2022-03-16
Supplement: s1 [file s1]

## Supplementary Material 1

### Analyzing the consequences of sharing principles on different economies: a case study of wood panel production value chain

E. Alejandro PERDOMO E.<sup>1</sup> (\*),

Morten RYBERG<sup>2</sup>,

Eldbjørg BLIKRA VEA<sup>2</sup>,

Peter SCHWARZBAUER<sup>3</sup>,

Franziska HESSER<sup>1</sup>,

<sup>1</sup> Wood K plus – Competence Centre for Wood Composites and Wood Chemistry, Kompetenzzentrum Holz GmbH, Altenberger Straße 69, 4040 Linz, Austria

<sup>2</sup> Section for Quantitative Sustainability Assessment, Department of Technology, Management and Economics, Technical University of Denmark, Produktionstorvet, Building 424, 2800 Kgs. Lyngby, Denmark

<sup>3</sup> University of Natural Resources and Life Sciences Vienna, Department of Economics and Social Sciences, Institute of Marketing and Innovation, Feistmantelstraße 4, 1180 Wien

(\*) Corresponding Author

Email address: [e.perdomo@wood-kplus.at](mailto:e.perdomo@wood-kplus.at), [alejandro.perdomo@boku.ac.at](mailto:alejandro.perdomo@boku.ac.at)

**Table S1. Diesel Consumption for SRC agricultural processes**

| Process                       | L/ton d.m. * | Machinery                                     | Source ***                 |
|-------------------------------|--------------|-----------------------------------------------|----------------------------|
| Heavy disking                 | 0,094        | Fastrac 8310 + horsch joker 6                 | PD                         |
| Ploughing                     | 0,218        | Fastrac 8310 + lemken                         | (Nemecek and Kagi 2007)    |
| Harrowing                     | 0,072        | Rotary harrow                                 | PD                         |
| Planting                      | 0,187        | Ligno Planter -R-1R (Rod planter for one row) | PD                         |
| Mechanical Weed Control (20X) | 1,248        | Fetor + disk 2,5m                             | PD                         |
| Singling (Manually)           | 0            | Manual                                        | PD                         |
| Felling -bunching             | 1,816        | Shear harvester                               | PD                         |
| Extraction                    | 1,711        | Tractor 540m                                  | PD                         |
| Crosscutting                  | 1,602        | Grapple Saw                                   | PD                         |
| Chipping                      | 0,901        | Wood chooper                                  | PD                         |
| Stump excavation              | 4,32         | Excavating SP                                 | (de la Fuente et al. 2016) |

|                                        |       |                       |                            |
|----------------------------------------|-------|-----------------------|----------------------------|
| Rehabilitation of Field<br>(Ploughing) | 0,218 | Fastrac 8310 + lemken | (Nemecek and Kagi<br>2007) |
|----------------------------------------|-------|-----------------------|----------------------------|

\*\* d.m.= dry matter

\*\*\*PD = primary data

**Table S2. Oil Lubricant Consumption for SRC agricultural processes**

| Process           | Kg/ton d.m. | Machinery       | Source *** |
|-------------------|-------------|-----------------|------------|
| Felling -bunching | 0.0169      | Shear harvester | PD         |
| Extraction        | 0.0408      | Tractor 540m    | PD         |
| Crosscutting      | 0.0149      | Grapple Saw     | PD         |
| Chipping          | 0.0079      | Wood chopper    | PD         |

\*\*\*PD = primary data

**Table S3. Wood Input Material for Wood Panel production**

| Wood Input        | Kg d.m |
|-------------------|--------|
| Pine (70%)        | 345.57 |
| Poplar (30%)      | 148.10 |
| Bark <sup>1</sup> | 153.24 |

<sup>1</sup>23.68% is assumed to be bark (Kaestner, 2017)

**Table S4. Chemical Input Material for Wood Panel production (source: own calculations)**

| Chemical input <sup>1</sup> | Amount (Kg/1m3 Wood Panel) |
|-----------------------------|----------------------------|
| Phenol-formaldehyde         | 15.90                      |
| MDI resin                   | 3.06                       |
| Wax                         | 7.24                       |
| Total Chemical input        | 26.20                      |

<sup>1</sup>Based on (Kaestner, 2017)

**Table S5 Wood Mass Balance Output for LWB (per m3) (Source: Own calculation)**

| Output                          | Amount (Kg/1m3 Wood Panel) |
|---------------------------------|----------------------------|
| Wood panel density <sup>1</sup> | 500                        |

|                                     |        |
|-------------------------------------|--------|
| <b>LWB (wood)<sup>2</sup></b>       | 479.04 |
| <b>Wood residues</b>                | 168.35 |
| <b>Unaccounted wood<sup>3</sup></b> | -0.47  |
| <b>Total wood</b>                   | 646.92 |

<sup>1</sup> Wood panel density was obtained through discussions with wood-panel manufacturers. The density is an average estimation of a Lightweight board (LWB).

<sup>2</sup> Wood mass was calculated based on the LWB weight (500 Kg/m<sup>3</sup>) minus 80% of the total use of chemical input. It is assumed 20% of the chemical input is lost during the manufacturing (e.g., due to condensation) (Kaestner, 2017)

<sup>3</sup> Unaccounted wood refers to the mass difference between calculated wood input and calculated output material flow. The difference might be due to the different densities and necessary assumptions.

**Table S6 Electricity consumption for m3 of LWB (Source: IKEA Industry)**

| <b>Processes</b>        | <b>Amount (Mj/ 1m3 Wood Panel)</b> |
|-------------------------|------------------------------------|
| <b>Debarking</b>        | 20.73                              |
| <b>Flaking</b>          | 37.09                              |
| <b>Chip preparation</b> | 70.91                              |
| <b>Drying</b>           | 137.45                             |
| <b>Energy plant</b>     | 51.82                              |
| <b>Blending</b>         | 0.00                               |
| <b>Screening</b>        | 50.18                              |
| <b>Forming Line</b>     | 102.55                             |
| <b>Exhausting</b>       | 74.18                              |
| <b>Continues Press</b>  | 97.09                              |
| <b>Cooling</b>          | 0.00                               |
| <b>Sanding+</b>         | 30.00                              |
| <b>Trimming+</b>        | 0.00                               |
| <b>Sawing</b>           | 2.73                               |
| <b>Storage</b>          | 0.82                               |
| <b>Compressed air</b>   | 46.36                              |
| <b>Other</b>            | 54.55                              |
| <b>SUM</b>              | <b>776,45</b>                      |

\* Energy content natural gas 54.45 MJ/m<sup>3</sup> (Puettmann et al., 2013)

## S1 References

Kaestner, D., 2017. Compile a Life Cycle Assessment of the OSB and Plywood Industries in the U.S. & Analysis of the OSB and Plywood Industries in the U.S. based on a Life Cycle Assessment 1–79.

Puettmann, M., Oneil, E., Kline, E., Johnson, L., 2013. Cradle to Gate Life Cycle Assessment of Oriented Strandboard Production from the Southeast 1–23.
