# Supplementary material for: Analyzing the Consequences of Sharing Principles on Different Economies: A Case Study of Short Rotation Coppice Poplar Wood Panel Production Value Chain
Source: MDPI journal article supplement (doi:10.3390/f13030461), 2022-03-16
Supplement: s1 [file s1]

Archive with 2 entries (2 files):
- Supplementary  Material 1.pdf
- Supplementary  Material 2.xlsx
