# Supplementary material for: Analyzing the Consequences of Sharing Principles on Different Economies: A Case Study of Short Rotation Coppice Poplar Wood Panel Production Value Chain
Source: MDPI journal article supplement (doi:10.3390/f13030461), 2022-03-16
Supplement: s1 [file s1 › Supplementary Material 2.xlsx]

## Sheet: Supportive Information
	Supplementary material 2
	Analyzing the consequences of sharing principles on different economies: a case study of wood panel production value chain
	E. Alejandro PERDOMO E.1 (*),
	Morten RYBERG2,
	Eldbjørg BLIKRA VEA2,
	Peter SCHWARZBAUER3,
	Franziska HESSER1,
	1 Wood K plus – Competence Centre for Wood Composites and Wood Chemistry, Kompetenzzentrum Holz GmbH, Altenberger Straße 69, 4040 Linz, Austria
	2 Section for Quantitative Sustainability Assessment, Department of Technology, Management and Economics, Technical University of Denmark, Produktionstorvet, Building 424, 2800 Kgs. Lyngby, Denmark
	3 University of Natural Resources and Life Sciences Vienna, Department of Economics and Social Sciences, Institute of Marketing and Innovation, Feistmantelstraße 4, 1180 Wien
	(*) Corresponding Author
	Email address:	e.perdomo@wood-kplus.at, alejandro.perdomo@boku.ac.at
	This supporting information presents the the PB-LCA calculations for Austria and Slovakia

## Sheet: Summary_Results
					Global to Nation
					aSoS_AT	0.00117674
					aSoS_SK	0.000731471
					Nation to Industry				GVA
					aSoS_AT_GVA	0.00144924			aSoS_POP_Industry_Value chain_AT	1.604e-07
					aSoS_SK_GVA	0.000753198			aSoS_POP_Industry_Value chain_SK	1.65283e-07
									FCE
					aSoS_AT_FCE	0.0236926			aSoS_POP_Industry_Value chain_AT	2.62225e-06
					aSoS_SK_FCE	0.0474425			aSoS_POP_Industry_Value chain_SK	1.04109e-05
									GF
					aSoS_AT_GF	0.0192683			aSoS_POP_Industry_Value chain_AT	2.13259e-06
					aSoS_SK_GF	0.00896955			aSoS_POP_Industry_Value chain_SK	1.96829e-06
					Industry to Value chain
					aSoS_AT_VC	0.0940553
					aSoS_SK_VC	0.3

## Sheet: Popoulation_Based Downscailing
							Population								Source
								2015	2016	2017	2018	2019	2020		https://data.worldbank.org/indicator/SP.POP.TOTL?locations=SK
							POP(Slovakia)	5423801	5430798	5439232	5446771	5454147	5458827
							POP(Austria)	8642699	8736668	8797566	8840521	8879920	8917205
							POP (World)	7339076654	7424484741	7509410228	7592475615	7673345391	7752840547
							Population based aS
								2015	2016	2017	2018	2019	2020
							aS_World_SK	0.00073903	0.000731471	0.000724322	0.000717391	0.000710791	0.000704107
							aS_World_AT	0.00117763	0.00117674	0.00117154	0.00116438	0.00115724	0.00115019
							Difference (%)	37.2441	37.839	38.1734	38.3886	38.5789	38.7832

## Sheet: GVA_Downscailing
		GVA_aSOS
			Austria	Slovakia
		Population	8736668	5430798		Source
		GVA_Country (€)	318952700000	73022000000		Accessed 01.09.2021
		GVA (Agriculture, forestry and fishing Sector) (€)	3970600000	2181500000		European comission	https://ec.europa.eu/eurostat/databrowser/view/nama_10_a10/default/table?lang=en
		aS (Agriculture, forestry and fishing Sector)	1.4649e-05	2.18524e-05		European comission	https://ec.europa.eu/eurostat/databrowser/view/nama_10_a10/default/table?lang=en							Gross value added and income by A*10 industry breakdowns
		GVA_Manufacture of veneer sheets and wood-based panels (Industry)	462240000	55000000		EuroStat	https://appsso.eurostat.ec.europa.eu/nui/submitViewTableAction.do Annual detailed enterprise statistics for industry (NACE Rev. 2, B-E)	Annual detailed enterprise statistics for industry (NACE Rev. 2, B-E)
		GVA_aS(Industry)	0.00144924	0.000753198
		GVA_aS(POP&Industry)	1.70538e-06	5.50943e-07
		GVA_aS(POP_Industry_VC)	1.604e-07	1.65283e-07
		Increase of FCE for SK to have a aSOS equal to AT
		GVA_Manufacture of veneer sheets and wood-based panels (Industry)		1.05827e+08
		GVA_aS(Industry)		0.00144924
		Percentage Increase (%)		92.4121

## Sheet: FCE_Downscailing
						FCE
							Austria	Slovakia	Source
						Apperent Consumption_WoodPanels (m3)	1425295	977168	Using FAO Data
						FCE_woodPanel(€)	6.08936e+09	2.84404e+09
						FCE_AT (€)	2.57016e+11	5.9947e+10	World bank
						FCE_aS(Industry)	0.0236926	0.0474425	Own Calculation
						FCE_aS(POP&Industry)	1.73304e-05	3.47029e-05	Own Calculation
						FCE_aS(POP_Industry_VC)	2.62225e-06	1.04109e-05	Own Calculation
						Increase of FCE for Austria to have a aSOS equal to SK
						FCE_woodPanel(€)	1.21935e+10
						FCE_aS_WoodPanel_Industry	0.0474425
						Percentage Increase (%)	100.242

## Sheet: GrandFathering
					Parameter	Unit	Value	Column1	Source
					1. Global-level
					GHG emissions in 2013	GtCO2eq	47.41		Climate watch data (2021)	https://www.climatewatchdata.org/ghg-emissions?breakBy=regions&end_year=2018&start_year=1990
					GHG target at the global level
					Radiative forcing	Wm-2	2.6		Chandrakumar (2018) Renaud and Matthews (2015)
					GWP of CO2	W.yr/(m2kgGWP100yrCO2eq)	8.69*10^(-14)		Chandrakumar (2018) Doka (2016)
					Annual carbon budget	GtCO2eq/yr	29.9194
					Wood Based Panels Production GLOBAL
					Parameter	Unit	Value	Year	Source
					1. Global-level
					Plywood	m3	116951120		FAO (2021)
					Particle board	m3	94406049
					OSB	m3	29098486
					Hardboard	m3	8621878
					MDF/HDF	m3	104129132
					Other fibreboard	m3	8476005
					Veneer sheets	m3	13933671
					Total production	m3	375616341	2015
					CO2 Contribution of Wood-based panels Globally
							Tonn CO2 Emissions for Production of 1m3	Global Contribution (Tonn CO2) for 2016											Calculation of Emissions for Dry Venner
					Plyywood		0.28	3.27463e+07	Wang S., et al 2012 (average between US and China)										Puettmann M. 2013 for USA
					Fiberboard		0.445	3.77182e+06	Wang S., et al 2012 (average between US and China)										Laminated Veneer Lumber	1	m3
					Partcleboard		0.48	4.53149e+07	Wang S., et al 2012 (average between US and China)										Veneer, dry	603.28	kg
					Hardboard		0.627	5.40592e+06	Bergmann (2015) for USA										Veneer, dry	1.09488	m3
					MDF/HDF		0.48	4.9982e+07	Assumed to be equal to Particle board										Venneer Density, oven dry	551	kg/m3
					OSB		0.178	5.17953e+06	Puettmann M. 2016 for USA										GHG emission Production
					Veneer Sheets		0.110816	1.54407e+06	Puettmann M. 2013 for USA											kg CO2 equiv	%	%
					𝐺𝐻G_𝐺𝑙𝑜𝑏𝑎𝑙,𝑊𝑃 𝐼𝑛𝑑𝑢𝑠𝑡𝑟𝑦 (2016)		GtCO2	0.0143945	Own Calculation										Forestry operation	13.57	6.40276	57.2473
					% GHG emissions from the Woodbased panel industry to the Total Global Emission		%	0.0303616	Own Calculation										Venner production	107.76	50.8446
					Allocated carbon budget for the Woodbased panel Industry		GtCO2eq/yr	0.00908404	Own Calculation										LVL production	90.61	42.7527	42.7527
																			Total	211.94
					Wood Based Panels Production Slovakia														Own Calculation
					Parameter	Unit	Value		Source										Veneer, dry	1	m3
								Carbon Contribution ( Tonn CO2) for 2016											GHG emission	110.816	kg CO2 equiv
					Plywood	m3	420300	81480	FAO (2021)
					Particle board	m3	594500	285360	FAO (2021)
					OSB	m3
					Hardboard	m3
					MDF/HDF	m3
					Other fibreboard	m3
					Veneer sheets	m3	17300	1917.11
					Total production	m3	1032100	368757
					GHG Slovakia WP Industry			0.000368757	GtCO2eq
					Wood Based Panels Production & Emissions Austria
					Parameter	Unit	Value	Year	Source
								Carbon Contribution ( Tonn CO2) for 2016
					Plywood	m3	291000	81480	FAO (2021)
					Particle board	m3	2350000	1128000	FAO (2021)
					OSB	m3	0
					Hardboard	m3	82300	51602.1
					MDF/HDF	m3	556000	266880
					Other fibreboard	m3	5700	2536.5
					Veneer sheets	m3	7000	775.709
					Total production	m3	3292000	1.53127e+06
					GHG Austria WP Industry			0.00153127	GtCO2eq
					National GHG Emissions
					Total GHG_Austria	0.079471	GtCO2eq	https://stats.oecd.org/Index.aspx?DataSetCode=AIR_GHG#	Organisation for Economic Co-operation and Development (OECD)
					Total GHG_Slovakia	0.0411121	GtCO2eq	https://stats.oecd.org/Index.aspx?DataSetCode=AIR_GHG#
					Own Calculation
					as_Industry_AT	0.0192683	Percentage difference
					as_Industry_SK	0.00896955	72.9431
					aSoS_Pop_GF_Industry
					as_POP_Industry_AT	2.26738e-05
					as_POP_Industry_SK	1.05548e-05	72.9431
					aSoS_Pop_GF_Value Chain
					aSoS_POP_Industry_Value chain_AT	2.13259e-06
					aSoS_POP_Industry_Value chain_SK	1.96829e-06	8.01282
					aSoS_Pop_GF_Industry = Assigned Safe Operating space at Industry level in a country using the Per capita approach and Grandfathering approach
					aSoS_Pop_GF_Value Chain= Assigned Safe Operating space at Value chain level in a country using the Per capita approach and Grandfathering approach
					Own Calculation
					CB_Industry_Austria	0.000966355	GtCO2eq
					CB_Industry_Slovakia	0.000232715	GtCO2eq

## Sheet: Value Chain_AT_SK
											Austria						Slovakia
											Value Chain Level						Value Chain Level
												m3	Ton					m3	Ton
											Supply_AT	3292000	3292	Using FAO Data			Supply_Slovakia	1032100	1032.1	Using FAO Data
											Supply_ValueChain	309630	309.63	Assumption equal to FU (SK)			Supply_ValueChain	309630	309.63	Own source (30% assumption)
											as_Value chain_AT	0.0940553					as_Value chain	0.3
											as_Value chain_SK	0.3
																	0.3	309630
																	0.2	206420
																	0.1	103210

## Sheet: Downscaling_Comparison
												aS_National_POP
												Austria	0.00117674
												Slovakia	0.000731471
												Percentage difference	46.6685
										aS_WoodPanel_Industry
											GVA	FCE	GF
										Austria	1.70538e-06	1.73304e-05	2.26738e-05
										Slovakia	5.50943e-07	3.47029e-05	1.05548e-05
											Austria	Slovakia	Austria
										aS_WoodPanel_Value Chain
											GVA	FCE	GF
										Austria	1.604e-07	2.62225e-06	2.13259e-06		176.943
										Slovakia	1.65283e-07	1.04109e-05	1.96829e-06		16.3482	2.62225e-06
											Slovakia	Slovakia	Austria		5.28929

## Sheet: PB_SoS
																	Safe Operating Space
																	Slovakia							Austria
																		GVA		FCE		GF		GVA		FCE		GF
														Impact category				Industry Level	Value Chain Level	Industry Level	Value Chain Level	Industry Level	Value Chain Level	Industry Level	Value Chain Level	Industry Level	Value Chain Level	Industry Level	Value Chain Level
															SoS for Human Activities	Unit	Only Population based	GVA & POP	GVA & POP	FCE & POP	FCE & POP	GF&POP	GF&POP	GVA & POP	GVA & POP	FCE & POP	FCE & POP	GF&POP	GF&POP
														Climate change—Energy imbalance	1	Wm−2	0.000731471	5.50943e-07	1.65283e-07	3.47029e-05	1.04109e-05	1.96829e-06	1.96829e-06	1.70538e-06	1.604e-07	1.73304e-05	2.62225e-06	2.26738e-05	1.96829e-06
														Climate change as atmospheric CO2 concentration	72	ppmCO2	0.0526659	3.96679e-05	1.19004e-05	0.00249861	0.000749582	0.000141717	0.000141717	0.000122787	1.15488e-05	0.00124779	0.000188802	0.00163251	0.000141717
														Ocean acidification	0.68	Ωaragonite [mole]	0.000497401	3.74641e-07	1.12392e-07	2.35979e-05	7.07938e-06	1.33844e-06	1.33844e-06	1.15966e-06	1.09072e-07	1.17847e-05	1.78313e-06	1.54182e-05	1.33844e-06
														Stratospheric ozone depletion	15	Dobson units	0.0109721	8.26414e-06	2.47924e-06	0.000520543	0.000156163	2.95244e-05	2.95244e-05	2.55807e-05	2.406e-06	0.000259956	3.93338e-05	0.000340107	2.95244e-05
														Atmospheric aerosol loading_AOD (Global CFs shown)	0.11	--	8.04619e-05	6.06037e-08	1.81811e-08	3.81732e-06	1.14519e-06	2.16512e-07	2.16512e-07	1.87592e-07	1.7644e-08	1.90635e-06	2.88448e-07	2.49411e-06	2.16512e-07
														Biogeochemical flows_Ncycle_Global	62	Tg N yr−1	0.0453512	3.41584e-05	1.02475e-05	0.00215158	0.000645473	0.000122034	0.000122034	0.000105733	9.94479e-06	0.00107449	0.00016258	0.00140577	0.000122034
														Biogeochemical flows_P_Global_P flow from freshwater systems into the oceans	6.2	Tg P yr−1	0.00453512	3.41584e-06	1.02475e-06	0.000215158	6.45473e-05	1.22034e-05	1.22034e-05	1.05733e-05	9.94479e-07	0.000107449	1.6258e-05	0.000140577	1.22034e-05
														Land-system change_Biome: area of forested land_Temperate forest transformation	50	%	0.0365736	2.75471e-05	8.26414e-06	0.00173514	0.000520543	9.84145e-05	9.84145e-05	8.52689e-05	8.01999e-06	0.000866521	0.000131113	0.00113369	9.84145e-05

## Sheet: Market Data_AT
					Wood-based panels + Veener sheets (Austria)				Source:	FAO data based on imputation methodology
						2016				http://www.fao.org/faostat/en/#data/FO/visualize
					Production Total (m3)	3292000				In the production and trade statistics, it represents the sum of plywood, particle board, OSB and fibreboard. It is reported in cubic metres solid volume
					Import Quantity (m3)	941140
					Import Value (US$)	4485200000
					Export Quantity (m3)	2807845
					Export Value (US$)	13173190000
					Import Unit Value (US$/m3)	4765.71
					Export Unit Value (US$/m3)	4691.57					2016	2017
					Import Unit Value (€/m3)	4305.85				Exchange Rate Avg (US$)	1.1068	1.1304
					Export Unit Value (€/m3)	4238.86
					Average Unit Value_SK (€/m3)	4272.35
					FCE
						2016	2016
						US$	€	Source
					Austria	2.84465e+11	2.57016e+11	World bank
					World	5.65165e+13	5.1063e+13	World bank

[truncated: 4 more sheets: Market Data_SK, Env_Ass_Results, Dendromas Prod (PB-Results), Dendromas Prod (PB-Results)_FSe]
